# Supplementary material for: Depressive Emotion Detection and Behavior Analysis of Men Who Have Sex With Men via Social Media
Source: Front Psychiatry. 2020 Aug 14;11:830. doi: 10.3389/fpsyt.2020.00830 (PMC7456911; doi:10.3389/fpsyt.2020.00830)
Supplement: Additional file 1 — emoji_and_emoticon_library.xlsx. [file Table_1.xlsx]

## Sheet: emojis for filtering in Blued
嘿嘿	[嘿嘿]
苦笑	[苦笑]
呲牙	[呲牙]
强颜欢笑	[强颜欢笑]
憨笑	[憨笑]
笑哭	[笑哭]
哭笑	[哭笑]
笑出眼泪	[笑出眼泪]
破涕为笑	[破涕为笑]
笑死	[笑死]
笑尿	[笑尿]
笑cry	[笑cry]
大笑	[大笑]
高兴	[高兴]
笑脸	[笑脸]
嗨皮	[嗨皮]
哈哈	[哈哈]
哈哈哈	[哈哈哈]
笑	[笑]
不好意思	[不好意思]
冷汗	[冷汗]
尴尬	[尴尬]
魔鬼	[魔鬼]
恶魔	[恶魔]
眨眼	[眨眼]
使眼色	[使眼色]
wink	[wink]
开心	[开心]
可爱	[可爱]
害羞	[害羞]
微笑	[微笑]
满意	[满意]
嗯嗯	[嗯嗯]
嘻嘻	[嘻嘻]
萌萌哒	[萌萌哒]
好吃	[好吃]
嘴馋	[嘴馋]
馋嘴	[馋嘴]
美味	[美味]
好吧	[好吧]
释然	[释然]
放松	[放松]
悠闲	[悠闲]
好美	[好美]
喜欢	[喜欢]
哇塞	[哇塞]
哼哼	[哼哼]
偷笑	[偷笑]
冷笑	[冷笑]
哼	[哼]
嫌弃	[嫌弃]
不爽	[不爽]
鄙视	[鄙视]
不高兴	[不高兴]
斜眼	[斜眼]
汗	[汗]
流汗	[流汗]
对不起	[对不起]
担忧	[担忧]
犯错	[犯错]
抱歉	[抱歉]
难受	[难受]
纠结	[纠结]
痛苦	[痛苦]
爱你	[爱你]
飞吻	[飞吻]
么么哒	[么么哒]
亲	[亲]
亲亲	[亲亲]
鬼脸	[鬼脸]
做鬼脸	[做鬼脸]
略略略	[略略略]
开玩笑	[开玩笑]
吐舌头	[吐舌头]
调皮	[调皮]
啦啦啦	[啦啦啦]
难过	[难过]
失望	[失望]
失落	[失落]
低落	[低落]
生气	[生气]
气愤	[气愤]
皱眉	[皱眉]
气死我了	[气死我了]
愤怒	[愤怒]
很生气	[很生气]
去死	[去死]
我擦	[我擦]
想哭	[想哭]
悲伤	[悲伤]
哭泣	[哭泣]
委屈	[委屈]
难受	[难受]
担心	[担心]
为啥	[为啥]
困	[困]
好困	[好困]
打瞌睡	[打瞌睡]
瞌睡	[瞌睡]
缺觉	[缺觉]
哭	[哭]
伤心	[伤心]
大哭	[大哭]
不开心	[不开心]
流泪	[流泪]
桑心	[桑心]
害怕	[害怕]
焦虑	[焦虑]
卧槽	[卧槽]
天呐	[天呐]
天啊	[天啊]
恐怖	[恐怖]
可怕	[可怕]
吃惊	[吃惊]
纳尼	[纳尼]
晕	[晕]
好晕	[好晕]
我晕	[我晕]
啥	[啥]
脸红	[脸红]
害臊	[害臊]
生病	[生病]
感冒	[感冒]
口罩	[口罩]
吼吼	[吼吼]
艾玛	[艾玛]
矮油	[矮油]
笑死了	[笑死了]
哈哈哈哈	[哈哈哈哈]
天使	[天使]
光环	[光环]
酷	[酷]
墨镜	[墨镜]
得意	[得意]
王家卫	[王家卫]
机智	[机智]
无语	[无语]
无fuck说	[无fuck说]
不想说话	[不想说话]
冷漠	[冷漠]
木了	[木了]
无言以对	[无言以对]
心塞	[心塞]
不理你了	[不理你了]
讨厌	[讨厌]
伐开心	[伐开心]
算了	[算了]
嘴一个	[嘴一个]
啵一个	[啵一个]
么么	[么么]
打我啊	[打我啊]
郁闷	[郁闷]
气死	[气死]
好气	[好气]
好气啊	[好气啊]
坑爹	[坑爹]
惊呆	[惊呆]
是吗	[是吗]
疑问	[疑问]
不嘛	[不嘛]
不要嘛	[不要嘛]
厌倦	[厌倦]
酱紫	[酱紫]
原来如此	[原来如此]
哦	[哦]
傻笑	[傻笑]
牙白	[牙白]
不懂	[不懂]
不明白	[不明白]
没看懂	[没看懂]
睡觉	[睡觉]
晚安	[晚安]
睡了	[睡了]
碎觉	[碎觉]
眼冒金星	[眼冒金星]
冒金星	[冒金星]
囧	[囧]
无话可说	[无话可说]
崩溃	[崩溃]
抓狂	[抓狂]
疲惫	[疲惫]
苦逼	[苦逼]
兔女郎	[兔女郎]
闺蜜	[闺蜜]
拉拉	[拉拉]
婴儿	[婴儿]
小宝宝	[小宝宝]
男孩	[男孩]
男孩儿	[男孩儿]
女孩	[女孩]
女孩儿	[女孩儿]
男人	[男人]
女人	[女人]
牵手	[牵手]
恋爱	[恋爱]
黄头发	[黄头发]
举手	[举手]
双手赞成	[双手赞成]
鼓掌	[鼓掌]
说的好	[说的好]
耳朵	[耳朵]
听	[听]
眼睛	[眼睛]
看	[看]
偷看	[偷看]
鼻子	[鼻子]
红唇	[红唇]
嘴唇	[嘴唇]
嘴	[嘴]
嘴巴	[嘴巴]
吻痕	[吻痕]
唇印	[唇印]
指甲油	[指甲油]
美甲	[美甲]
再见	[再见]
拜拜	[拜拜]
友尽	[友尽]
强	[强]
厉害	[厉害]
赞	[赞]
真棒	[真棒]
垃圾	[垃圾]
辣鸡	[辣鸡]
向上	[向上]
上面	[上面]
向下	[向下]
下面	[下面]
向左	[向左]
左边	[左边]
向右	[向右]
右边	[右边]
好	[好]
好的	[好的]
ok	[ok]
可以	[可以]
行	[行]
胜利	[胜利]
噢耶	[噢耶]
耶	[耶]
我赢了	[我赢了]
拳头	[拳头]
揍你	[揍你]
宣誓	[宣誓]
加油	[加油]
张开手	[张开手]
保佑	[保佑]
拜托	[拜托]
拜托了	[拜托了]
小树苗	[小树苗]
椰子树	[椰子树]
仙人掌	[仙人掌]
郁金香	[郁金香]
樱花	[樱花]
玫瑰	[玫瑰]
芙蓉	[芙蓉]
向日葵	[向日葵]
向阳花	[向阳花]
太阳花	[太阳花]
花束	[花束]
稻穗	[稻穗]
枫叶	[枫叶]
落叶	[落叶]
叶子	[叶子]
瓜皮帽	[瓜皮帽]
头巾男	[头巾男]
爷爷	[爷爷]
老爷爷	[老爷爷]
奶奶	[奶奶]
老奶奶	[老奶奶]
警察	[警察]
工人	[工人]
公主	[公主]
女王	[女王]
卫兵	[卫兵]
天使	[天使]
圣诞老人	[圣诞老人]
幽灵	[幽灵]
便便	[便便]
大便	[大便]
翔	[翔]
一坨翔	[一坨翔]
骷髅	[骷髅]
外星人	[外星人]
怪物	[怪物]
前台	[前台]
接待员	[接待员]
引导员	[引导员]
否定	[否定]
不是	[不是]
拒绝	[拒绝]
肯定	[肯定]
是的	[是的]
同意	[同意]
按摩	[按摩]
理发	[理发]
剪头	[剪头]
剪头发	[剪头发]
爱情	[爱情]
亲吻	[亲吻]
电脑	[电脑]
相机	[相机]
摄像机	[摄像机]
电视机	[电视机]
收音机	[收音机]
传真机	[传真机]
软盘	[软盘]
光盘	[光盘]
灯泡	[灯泡]
卫星天线	[卫星天线]
钱袋	[钱袋]
银行卡	[银行卡]
公文包	[公文包]
雨伞	[雨伞]
邮箱	[邮箱]
插头	[插头]
电池	[电池]
电话	[电话]
沙漏	[沙漏]
腕表	[腕表]
剪刀	[剪刀]
信件	[信件]
铅笔	[铅笔]
注射器	[注射器]
药	[药]
图钉	[图钉]
回形针	[回形针]
手电筒	[手电筒]
扳手	[扳手]
锤子	[锤子]
螺丝钉	[螺丝钉]
刀	[刀]
手枪	[手枪]
显微镜	[显微镜]
望远镜	[望远镜]
书签	[书签]
满分	[满分]
页面	[页面]
电子邮箱	[电子邮箱]
图书	[图书]
线圈本	[线圈本]
笔记本	[笔记本]
笔记	[笔记]
三角尺	[三角尺]
直尺	[直尺]
板夹	[板夹]
卷轴	[卷轴]
铃铛	[铃铛]
静音	[静音]
取款机	[取款机]
银行	[银行]
医院	[医院]
酒店	[酒店]
邮局	[邮局]
教堂	[教堂]
爱情旅馆	[爱情旅馆]
学校	[学校]
便利店	[便利店]
百货商店	[百货商店]
工厂	[工厂]
城堡	[城堡]
房子	[房子]
办公楼	[办公楼]
牌楼	[牌楼]
自由女神像	[自由女神像]
钥匙	[钥匙]
锁	[锁]
开锁	[开锁]
火箭	[火箭]
飞机	[飞机]
高铁座椅	[高铁座椅]
船	[船]
快艇	[快艇]
电车	[电车]
和谐号	[和谐号]
高速列车	[高速列车]
地铁	[地铁]
公交车	[公交车]
自行车	[自行车]
观光火车	[观光火车]
直升机	[直升机]
燃料泵	[燃料泵]
路障	[路障]
红绿灯	[红绿灯]
救护车	[救护车]
消防车	[消防车]
警车	[警车]
出租车	[出租车]
汽车	[汽车]
越野车	[越野车]
运输车	[运输车]
货车	[货车]
拖拉机	[拖拉机]
缆车	[缆车]
洗澡	[洗澡]
马桶	[马桶]
淋浴	[淋浴]
炸弹	[炸弹]
蝴蝶结	[蝴蝶结]
礼物	[礼物]
蛋糕	[蛋糕]
南瓜灯	[南瓜灯]
圣诞树	[圣诞树]
焰火	[焰火]
烟花	[烟花]
礼花	[礼花]
气球	[气球]
流星	[流星]
彩带	[彩带]
毕业帽	[毕业帽]
王冠	[王冠]
日本娃娃	[日本娃娃]
鲤鱼旗	[鲤鱼旗]
风铃	[风铃]
中秋赏月	[中秋赏月]
旗帜	[旗帜]
竹子	[竹子]
戒指	[戒指]
钻石	[钻石]
红心	[红心]
心碎	[心碎]
信封	[信封]
丝带心	[丝带心]
一见钟情	[一见钟情]
灯笼	[灯笼]
帽子	[帽子]
眼镜	[眼镜]
男士衬衫	[男士衬衫]
短袖	[短袖]
牛仔裤	[牛仔裤]
连衣裙	[连衣裙]
比基尼	[比基尼]
手提包	[手提包]
皮鞋	[皮鞋]
运动鞋	[运动鞋]
高跟鞋	[高跟鞋]
脚印	[脚印]
口红	[口红]
书包	[书包]
跑步	[跑步]
滑雪	[滑雪]
冲浪	[冲浪]
游泳	[游泳]
骑马	[骑马]
跳舞	[跳舞]
划船	[划船]
小丑	[小丑]
礼帽	[礼帽]
足球	[足球]
棒球	[棒球]
露营	[露营]
高尔夫球	[高尔夫球]
网球	[网球]
篮球	[篮球]
橄榄球	[橄榄球]
台球	[台球]
保龄球	[保龄球]
绘画	[绘画]
马戏团	[马戏团]
靶心	[靶心]
老虎机	[老虎机]
骰子	[骰子]
帆船	[帆船]
麦克风	[麦克风]
耳机	[耳机]
摄影机	[摄影机]
萨克斯	[萨克斯]
音符	[音符]
音乐	[音乐]
小提琴	[小提琴]
钢琴	[钢琴]
小号	[小号]
吉他	[吉他]
高音谱号	[高音谱号]
游戏手柄	[游戏手柄]
奖杯	[奖杯]
门票	[门票]
电影	[电影]
滑雪板	[滑雪板]
格子旗	[格子旗]
白羊座	[白羊座]
金牛座	[金牛座]
双子座	[双子座]
巨蟹座	[巨蟹座]
狮子座	[狮子座]
处女座	[处女座]
天秤座	[天秤座]
天蝎座	[天蝎座]
射手座	[射手座]
摩羯座	[摩羯座]
水瓶座	[水瓶座]
双鱼座	[双鱼座]
卫生间	[卫生间]
男	[男]
女	[女]
小孩	[小孩]
禁止吸烟	[禁止吸烟]
蛇夫座	[蛇夫座]
老鼠	[老鼠]
仓鼠	[仓鼠]
牛	[牛]
老虎	[老虎]
兔子	[兔子]
猫	[猫]
赛马	[赛马]
马	[马]
绵羊	[绵羊]
鸡	[鸡]
小鸭	[小鸭]
小鸟	[小鸟]
企鹅	[企鹅]
大象	[大象]
骆驼	[骆驼]
野猪	[野猪]
猪头	[猪头]
狗	[狗]
狼	[狼]
熊	[熊]
考拉	[考拉]
猴脸	[猴脸]
猴子	[猴子]
蛇	[蛇]
青蛙	[青蛙]
鲸鱼	[鲸鱼]
海豚	[海豚]
章鱼	[章鱼]
鱼	[鱼]
热带鱼	[热带鱼]
海螺	[海螺]
毛毛虫	[毛毛虫]
掌印	[掌印]
蜗牛	[蜗牛]
蚂蚁	[蚂蚁]
蜜蜂	[蜜蜂]
瓢虫	[瓢虫]
乌龟	[乌龟]
蛋壳	[蛋壳]
小鸡	[小鸡]
熊猫	[熊猫]
猪鼻子	[猪鼻子]
龙头	[龙头]
大舌头	[大舌头]
不看	[不看]
不听	[不听]
不说	[不说]
闪电	[闪电]
火焰	[火焰]
月牙	[月牙]
太阳	[太阳]
云朵	[云朵]
水滴	[水滴]
打伞	[打伞]
阵风	[阵风]
雪花	[雪花]
星星	[星星]
日出	[日出]
照耀	[照耀]
彩虹	[彩虹]
海浪	[海浪]
地球	[地球]
板栗	[板栗]
松树	[松树]
杨树	[杨树]
黄花	[黄花]
玉米	[玉米]
树叶	[树叶]
四叶草	[四叶草]
蘑菇	[蘑菇]
西红柿	[西红柿]
茄子	[茄子]
葡萄	[葡萄]
哈密瓜	[哈密瓜]
西瓜	[西瓜]
橙子	[橙子]
柠檬	[柠檬]
香蕉	[香蕉]
菠萝	[菠萝]
苹果	[苹果]
青苹果	[青苹果]
梨	[梨]
桃子	[桃子]
樱桃	[樱桃]
草莓	[草莓]
汉堡	[汉堡]
米饼	[米饼]
饭团	[饭团]
米饭	[米饭]
咖喱饭	[咖喱饭]
面条	[面条]
意大利面	[意大利面]
面包	[面包]
薯条	[薯条]
糯米团	[糯米团]
关东煮	[关东煮]
冰淇淋	[冰淇淋]
寿司	[寿司]
刨冰	[刨冰]
比萨	[比萨]
肘子	[肘子]
鸡腿	[鸡腿]
红薯	[红薯]
虾仁	[虾仁]
甜甜圈	[甜甜圈]
饼干	[饼干]
巧克力	[巧克力]
甜品	[甜品]
便当	[便当]
砂锅	[砂锅]
煎蛋	[煎蛋]
绿茶	[绿茶]
咖啡	[咖啡]
清酒	[清酒]
红酒	[红酒]
啤酒	[啤酒]
碰杯	[碰杯]
奶瓶	[奶瓶]
糖果	[糖果]
棒棒糖	[棒棒糖]
布丁	[布丁]
蜂蜜	[蜂蜜]
果汁	[果汁]
鸡尾酒	[鸡尾酒]
刀叉	[刀叉]
雪人	[雪人]
多云	[多云]

## Sheet: emoticons in Blued
嘿嘿	[嘿嘿]	POSITIVE
苦笑	[苦笑]	POSITIVE
呲牙	[呲牙]	POSITIVE
强颜欢笑	[强颜欢笑]	POSITIVE
憨笑	[憨笑]	POSITIVE
笑哭	[笑哭]	POSITIVE
哭笑	[哭笑]	POSITIVE
笑出眼泪	[笑出眼泪]	POSITIVE
破涕为笑	[破涕为笑]	POSITIVE
笑死	[笑死]	POSITIVE
笑尿	[笑尿]	POSITIVE
笑cry	[笑cry]	POSITIVE
大笑	[大笑]	POSITIVE
高兴	[高兴]	POSITIVE
笑脸	[笑脸]	POSITIVE
嗨皮	[嗨皮]	POSITIVE
哈哈	[哈哈]	POSITIVE
哈哈哈	[哈哈哈]	POSITIVE
笑	[笑]	POSITIVE
不好意思	[不好意思]	NEUTRAL
冷汗	[冷汗]	NEUTRAL
尴尬	[尴尬]	NEUTRAL
魔鬼	[魔鬼]	NEGATIVE
恶魔	[恶魔]	NEGATIVE
眨眼	[眨眼]	POSITIVE
使眼色	[使眼色]	POSITIVE
wiNEGATIVEk	[wiNEGATIVEk]	POSITIVE
开心	[开心]	POSITIVE
可爱	[可爱]	POSITIVE
害羞	[害羞]	POSITIVE
微笑	[微笑]	POSITIVE
满意	[满意]	POSITIVE
嗯嗯	[嗯嗯]	POSITIVE
嘻嘻	[嘻嘻]	POSITIVE
萌萌哒	[萌萌哒]	POSITIVE
好吃	[好吃]	POSITIVE
嘴馋	[嘴馋]	POSITIVE
馋嘴	[馋嘴]	POSITIVE
美味	[美味]	POSITIVE
好吧	[好吧]	POSITIVE
释然	[释然]	POSITIVE
放松	[放松]	POSITIVE
悠闲	[悠闲]	POSITIVE
好美	[好美]	POSITIVE
喜欢	[喜欢]	POSITIVE
哇塞	[哇塞]	POSITIVE
哼哼	[哼哼]	POSITIVE
偷笑	[偷笑]	POSITIVE
冷笑	[冷笑]	POSITIVE
哼	[哼]	NEGATIVE
嫌弃	[嫌弃]	NEGATIVE
不爽	[不爽]	NEGATIVE
鄙视	[鄙视]	NEGATIVE
不高兴	[不高兴]	NEGATIVE
斜眼	[斜眼]	NEGATIVE
汗	[汗]	NEGATIVE
流汗	[流汗]	NEGATIVE
对不起	[对不起]	NEGATIVE
担忧	[担忧]	NEGATIVE
犯错	[犯错]	NEGATIVE
抱歉	[抱歉]	NEGATIVE
难受	[难受]	NEGATIVE
纠结	[纠结]	NEGATIVE
痛苦	[痛苦]	NEGATIVE
爱你	[爱你]	POSITIVE
飞吻	[飞吻]	POSITIVE
么么哒	[么么哒]	POSITIVE
亲	[亲]	POSITIVE
亲亲	[亲亲]	POSITIVE
鬼脸	[鬼脸]	POSITIVE
做鬼脸	[做鬼脸]	POSITIVE
略略略	[略略略]	POSITIVE
开玩笑	[开玩笑]	POSITIVE
吐舌头	[吐舌头]	POSITIVE
调皮	[调皮]	POSITIVE
啦啦啦	[啦啦啦]	POSITIVE
难过	[难过]	NEGATIVE
失望	[失望]	NEGATIVE
失落	[失落]	NEGATIVE
低落	[低落]	NEGATIVE
生气	[生气]	NEGATIVE
气愤	[气愤]	NEGATIVE
皱眉	[皱眉]	NEGATIVE
气死我了	[气死我了]	NEGATIVE
愤怒	[愤怒]	NEGATIVE
很生气	[很生气]	NEGATIVE
去死	[去死]	NEGATIVE
我擦	[我擦]	NEGATIVE
想哭	[想哭]	NEGATIVE
悲伤	[悲伤]	NEGATIVE
哭泣	[哭泣]	NEGATIVE
委屈	[委屈]	NEGATIVE
难受	[难受]	NEGATIVE
担心	[担心]	NEGATIVE
为啥	[为啥]	NEGATIVE
困	[困]	NEGATIVE
好困	[好困]	NEGATIVE
打瞌睡	[打瞌睡]	NEGATIVE
瞌睡	[瞌睡]	NEGATIVE
缺觉	[缺觉]	NEGATIVE
哭	[哭]	NEGATIVE
伤心	[伤心]	NEGATIVE
大哭	[大哭]	NEGATIVE
不开心	[不开心]	NEGATIVE
流泪	[流泪]	NEGATIVE
桑心	[桑心]	NEGATIVE
害怕	[害怕]	NEGATIVE
焦虑	[焦虑]	NEGATIVE
卧槽	[卧槽]	NEGATIVE
天呐	[天呐]	NEGATIVE
天啊	[天啊]	NEGATIVE
恐怖	[恐怖]	NEGATIVE
可怕	[可怕]	NEGATIVE
吃惊	[吃惊]	NEGATIVE
纳尼	[纳尼]	NEGATIVE
晕	[晕]	NEGATIVE
好晕	[好晕]	NEGATIVE
我晕	[我晕]	NEGATIVE
啥	[啥]	NEGATIVE
脸红	[脸红]	NEUTRAL
害臊	[害臊]	NEUTRAL
生病	[生病]	NEGATIVE
感冒	[感冒]	NEGATIVE
口罩	[口罩]	NEGATIVE
吼吼	[吼吼]	POSITIVE
艾玛	[艾玛]	POSITIVE
矮油	[矮油]	POSITIVE
笑死了	[笑死了]	POSITIVE
哈哈哈哈	[哈哈哈哈]	POSITIVE
天使	[天使]	POSITIVE
光环	[光环]	POSITIVE
酷	[酷]	POSITIVE
墨镜	[墨镜]	POSITIVE
得意	[得意]	POSITIVE
王家卫	[王家卫]	POSITIVE
机智	[机智]	POSITIVE
无语	[无语]	NEGATIVE
无fuck说	[无fuck说]	NEGATIVE
不想说话	[不想说话]	NEGATIVE
冷漠	[冷漠]	NEGATIVE
木了	[木了]	NEGATIVE
无言以对	[无言以对]	NEGATIVE
心塞	[心塞]	NEGATIVE
不理你了	[不理你了]	NEGATIVE
讨厌	[讨厌]	NEGATIVE
伐开心	[伐开心]	NEGATIVE
算了	[算了]	NEGATIVE
嘴一个	[嘴一个]	POSITIVE
啵一个	[啵一个]	POSITIVE
么么	[么么]	POSITIVE
打我啊	[打我啊]	POSITIVE
郁闷	[郁闷]	NEGATIVE
气死	[气死]	NEGATIVE
好气	[好气]	NEGATIVE
好气啊	[好气啊]	NEGATIVE
坑爹	[坑爹]	NEGATIVE
惊呆	[惊呆]	NEUTRAL
是吗	[是吗]	NEUTRAL
疑问	[疑问]	NEUTRAL
不嘛	[不嘛]	NEGATIVE
不要嘛	[不要嘛]	NEGATIVE
厌倦	[厌倦]	NEGATIVE
酱紫	[酱紫]	NEUTRAL
原来如此	[原来如此]	NEUTRAL
哦	[哦]	NEUTRAL
傻笑	[傻笑]	POSITIVE
牙白	[牙白]	POSITIVE
不懂	[不懂]	NEUTRAL
不明白	[不明白]	NEUTRAL
没看懂	[没看懂]	NEUTRAL
睡觉	[睡觉]	NEUTRAL
晚安	[晚安]	NEUTRAL
睡了	[睡了]	NEUTRAL
碎觉	[碎觉]	NEUTRAL
眼冒金星	[眼冒金星]	NEGATIVE
冒金星	[冒金星]	NEGATIVE
囧	[囧]	NEUTRAL
无话可说	[无话可说]	NEUTRAL
崩溃	[崩溃]	NEGATIVE
抓狂	[抓狂]	NEGATIVE
疲惫	[疲惫]	NEGATIVE
苦逼	[苦逼]	NEGATIVE
举手	[举手]	POSITIVE
双手赞成	[双手赞成]	POSITIVE
鼓掌	[鼓掌]	POSITIVE
说的好	[说的好]	POSITIVE
再见	[再见]	NEGATIVE
拜拜	[拜拜]	NEGATIVE
友尽	[友尽]	NEGATIVE
强	[强]	POSITIVE
厉害	[厉害]	POSITIVE
赞	[赞]	POSITIVE
真棒	[真棒]	POSITIVE
垃圾	[垃圾]	NEGATIVE
辣鸡	[辣鸡]	NEGATIVE
好	[好]	NEUTRAL
好的	[好的]	NEUTRAL
ok	[ok]	NEUTRAL
可以	[可以]	NEUTRAL
行	[行]	NEUTRAL
胜利	[胜利]	POSITIVE
噢耶	[噢耶]	POSITIVE
耶	[耶]	POSITIVE
我赢了	[我赢了]	POSITIVE
拳头	[拳头]	NEGATIVE
揍你	[揍你]	NEGATIVE
宣誓	[宣誓]	POSITIVE
加油	[加油]	POSITIVE
张开手	[张开手]	NEUTRAL
保佑	[保佑]	NEUTRAL
拜托	[拜托]	NEUTRAL
拜托了	[拜托了]	NEUTRAL
便便	[便便]	NEUTRAL
大便	[大便]	NEUTRAL
翔	[翔]	NEUTRAL
一坨翔	[一坨翔]	NEUTRAL
骷髅	[骷髅]	NEUTRAL
外星人	[外星人]	NEUTRAL
怪物	[怪物]	NEUTRAL
否定	[否定]	NEGATIVE
不是	[不是]	NEGATIVE
拒绝	[拒绝]	NEGATIVE
肯定	[肯定]	POSITIVE
是的	[是的]	POSITIVE
同意	[同意]	POSITIVE
爱情	[爱情]	POSITIVE
亲吻	[亲吻]	POSITIVE
注射器	[注射器]	NEGATIVE
药	[药]	NEGATIVE
满分	[满分]	POSITIVE
蝴蝶结	[蝴蝶结]	POSITIVE
礼物	[礼物]	POSITIVE
礼花	[礼花]	POSITIVE
气球	[气球]	POSITIVE
流星	[流星]	POSITIVE
彩带	[彩带]	POSITIVE
红心	[红心]	POSITIVE
心碎	[心碎]	NEGATIVE
丝带心	[丝带心]	POSITIVE
一见钟情	[一见钟情]	NEGATIVE
碰杯	[碰杯]	POSITIVE

## Sheet: emojis for filtering in Twitter
🌀
🌁
🌂
🌃
🌄
🌅
🌆
🌇
🌈
🌉
🌊
🌋
🌌
🌍
🌎
🌏
🌐
🌑
🌒
🌓
🌔
🌕
🌖
🌗
🌘
🌙
🌚
🌛
🌜
🌝
🌞
🌟
🌠
🌡
🌢
🌣
🌤
🌥
🌦
🌧
🌨
🌩
🌪
🌫
🌬
🌭
🌮
🌯
🌰
🌱
🌲
🌳
🌴
🌵
🌶
🌷
🌸
🌹
🌺
🌻
🌼
🌽
🌾
🌿
🍀
🍁
🍂
🍃
🍄
🍅
🍆
🍇
🍈
🍉
🍊
🍋
🍌
🍍
🍎
🍏
🍐
🍑
🍒
🍓
🍔
🍕
🍖
🍗
🍘
🍙
🍚
🍛
🍜
🍝
🍞
🍟
🍠
🍡
🍢
🍣
🍤
🍥
🍦
🍧
🍨
🍩
🍪
🍫
🍬
🍭
🍮
🍯
🍰
🍱
🍲
🍳
🍴
🍵
🍶
🍷
🍸
🍹
🍺
🍻
🍼
🍽
🍾
🍿
🎀
🎁
🎂
🎃
🎄
🎅
🎆
🎇
🎈
🎉
🎊
🎋
🎌
🎍
🎎
🎏
🎐
🎑
🎒
🎓
🎖
🎗
🎙
🎚
🎛
🎞
🎟
🎠
🎡
🎢
🎣
🎤
🎥
🎦
🎧
🎨
🎩
🎪
🎫
🎬
🎭
🎮
🎯
🎰
🎱
🎲
🎳
🎴
🎵
🎶
🎷
🎸
🎹
🎺
🎻
🎼
🎽
🎾
🎿
🏀
🏁
🏂
🏃
🏄
🏅
🏆
🏇
🏈
🏉
🏊
🏋
🏌
🏍
🏎
🏏
🏐
🏑
🏒
🏓
🏔
🏕
🏖
🏘
🏙
🏚
🏛
🏜
🏝
🏞
🏟
🏠
🏡
🏢
🏣
🏤
🏥
🏦
🏧
🏨
🏩
🏪
🏫
🏬
🏭
🏮
🏯
🏰
🏳
🏴
🏵
🏷
🏸
🏹
🏺
🏻
🏼
🏽
🏾
🏿
🐀
🐁
🐂
🐃
🐄
🐅
🐆
🐇
🐈
🐉
🐊
🐋
🐌
🐍
🐎
🐏
🐐
🐑
🐒
🐓
🐔
🐕
🐖
🐗
🐘
🐙
🐚
🐛
🐜
🐝
🐞
🐟
🐠
🐡
🐢
🐣
🐤
🐥
🐦
🐧
🐨
🐩
🐪
🐫
🐬
🐭
🐮
🐯
🐰
🐱
🐲
🐳
🐴
🐵
🐶
🐷
🐸
🐹
🐺
🐻
🐼
🐽
🐾
🐿
👀
👁
👂
👃
👄
👅
👆
👇
👈
👉
👊
👋
👌
👍
👎
👏
👐
👑
👒
👓
👔
👕
👖
👗
👘
👙
👚
👛
👜
👝
👞
👟
👠
👡
👢
👣
👤
👥
👦
👧
👨
👩
👪
👫
👬
👭
👮
👯
👰
👱
👲
👳
👴
👵
👶
👷
👸
👹
👺
👻
👼
👽
👾
👿
💀
💁
💂
💃
💄
💅
💆
💇
💈
💉
💊
💋
💌
💍
💎
💏
💐
💑
💒
💓
💔
💕
💖
💗
💘
💙
💚
💛
💜
💝
💞
💟
💠
💡
💢
💣
💤
💥
💦
💧
💨
💩
💪
💫
💬
💭
💮
💯
💰
💱
💲
💳
💴
💵
💶
💷
💸
💹
💺
💻
💼
💽
💾
💿
📀
📁
📂
📃
📄
📅
📆
📇
📈
📉
📊
📋
📌
📍
📎
📏
📐
📑
📒
📓
📔
📕
📖
📗
📘
📙
📚
📛
📜
📝
📞
📟
📠
📡
📢
📣
📤
📥
📦
📧
📨
📩
📪
📫
📬
📭
📮
📯
📰
📱
📲
📳
📴
📵
📶
📷
📸
📹
📺
📻
📼
📽
📿
🔀
🔁
🔂
🔃
🔄
🔅
🔆
🔇
🔈
🔉
🔊
🔋
🔌
🔍
🔎
🔏
🔐
🔑
🔒
🔓
🔔
🔕
🔖
🔗
🔘
🔙
🔚
🔛
🔜
🔝
🔞
🔟
🔠
🔡
🔢
🔣
🔤
🔥
🔦
🔧
🔨
🔩
🔪
🔫
🔬
🔭
🔮
🔯
🔰
🔱
🔲
🔳
🔴
🔵
🔶
🔷
🔸
🔹
🔺
🔻
🔼
🔽
🕂
🕆
🕇
🕉
🕊
🕋
🕌
🕍
🕎
🕐
🕑
🕒
🕓
🕔
🕕
🕖
🕗
🕘
🕙
🕚
🕛
🕜
🕝
🕞
🕟
🕠
🕡
🕢
🕣
🕤
🕥
🕦
🕧
🕭
🕯
🕰
🕳
🕴
🕵
🕶
🕷
🕸
🕹
🕺
🖇
🖊
🖋
🖌
🖍
🖎
🖐
🖑
🖒
🖓
🖕
🖖
🖤
🖥
🖨
🖱
🖲
🖼
🗂
🗃
🗄
🗑
🗒
🗓
🗜
🗝
🗞
🗡
🗣
🗨
🗩
🗯
🗳
🗺
🗻
🗼
🗽
🗾
🗿
😀
😁
😂
😃
😄
😅
😆
😇
😈
😉
😊
😋
😌
😍
😎
😏
😐
😑
😒
😓
😔
😕
😖
😗
😘
😙
😚
😛
😜
😝
😞
😟
😠
😡
😢
😣
😤
😥
😦
😧
😨
😩
😪
😫
😬
😭
😮
😯
😰
😱
😲
😳
😴
😵
😶
😷
😸
😹
😺
😻
😼
😽
😾
😿
🙀
🙁
🙂
🙃
🙄
🙅
🙆
🙇
🙈
🙉
🙊
🙋
🙌
🙍
🙎
🙏
🚀
🚁
🚂
🚃
🚄
🚅
🚆
🚇
🚈
🚉
🚊
🚋
🚌
🚍
🚎
🚏
🚐
🚑
🚒
🚓
🚔
🚕
🚖
🚗
🚘
🚙
🚚
🚛
🚜
🚝
🚞
🚟
🚠
🚡
🚢
🚣
🚤
🚥
🚦
🚧
🚨
🚩
🚪
🚫
🚬
🚭
🚮
🚯
🚰
🚱
🚲
🚳
🚴
🚵
🚶
🚷
🚸
🚹
🚺
🚻
🚼
🚽
🚾
🚿
🛀
🛁
🛂
🛃
🛄
🛅
🛇
🛋
🛌
🛍
🛎
🛏
🛐
🛑
🛒
🛠
🛡
🛢
🛣
🛤
🛥
🛩
🛫
🛬
🛰
🛳
🛴
🛵
🛶
🜡
🡇
🤐
🤑
🤒
🤓
🤔
🤕
🤖
🤗
🤘
🤙
🤚
🤛
🤜
🤝
🤞
🤠
🤡
🤢
🤣
🤤
🤥
🤦
🤧
🤰
🤳
🤴
🤵
🤶
🤷
🤸
🤹
🤺
🤼
🤽
🤾
🥀
🥁
🥂
🥃
🥄
🥅
🥇
🥈
🥉
🥊
🥋
🥐
🥑
🥒
🥓
🥔
🥕
🥖
🥗
🥘
🥙
🥚
🥛
🥜
🥝
🥞
🦀
🦁
🦂
🦃
🦄
🦅
🦆
🦇
🦈
🦉
🦊
🦋
🦌
🦍
🦎
🦏
🦐
🦑
🧀

## Sheet: emoticons in Twitter
👊	POSITIVE
👌	NEUTRAL
👍	POSITIVE
👎	NEGATIVE
👽	NEUTRAL
💀	NEGATIVE
👻	NEUTRAL
💉	NEGATIVE
💊	NEGATIVE
💏	POSITIVE
💐	POSITIVE
💑	POSITIVE
💓	POSITIVE
💔	NEGATIVE
💕	POSITIVE
💖	POSITIVE
💗	POSITIVE
💘	NEGATIVE
💙	POSITIVE
💚	POSITIVE
💛	POSITIVE
💜	POSITIVE
💝	POSITIVE
💞	POSITIVE
💟	POSITIVE
💠	NEUTRAL
💣	NEGATIVE
💤	NEUTRAL
💥	NEGATIVE
💩	NEUTRAL
💫	NEGATIVE
💯	POSITIVE
🖒	POSITIVE
🖓	NEGATIVE
🖤	POSITIVE
🗿	NEGATIVE
😀	POSITIVE
😁	POSITIVE
😂	POSITIVE
😃	POSITIVE
😄	POSITIVE
😅	POSITIVE
😆	POSITIVE
😇	POSITIVE
😈	POSITIVE
😉	POSITIVE
😊	POSITIVE
😋	POSITIVE
😌	POSITIVE
😍	POSITIVE
😎	POSITIVE
😏	POSITIVE
😐	NEUTRAL
😑	NEUTRAL
😒	NEGATIVE
😓	NEGATIVE
😔	NEGATIVE
😕	NEGATIVE
😖	NEGATIVE
😗	POSITIVE
😘	POSITIVE
😙	POSITIVE
😚	POSITIVE
😛	POSITIVE
😜	POSITIVE
😝	POSITIVE
😞	NEGATIVE
😟	NEGATIVE
😠	NEGATIVE
😡	NEGATIVE
😢	NEGATIVE
😣	NEGATIVE
😤	NEGATIVE
😥	NEGATIVE
😦	NEGATIVE
😧	NEGATIVE
😨	NEGATIVE
😩	NEGATIVE
😪	NEGATIVE
😫	NEGATIVE
😬	NEGATIVE
😭	NEGATIVE
😮	NEUTRAL
😯	NEUTRAL
😰	NEGATIVE
😱	NEGATIVE
😲	NEGATIVE
😳	NEUTRAL
😴	NEUTRAL
😵	NEGATIVE
😶	NEGATIVE
😷	NEGATIVE
😸	POSITIVE
😹	POSITIVE
😺	POSITIVE
😻	POSITIVE
😼	POSITIVE
😽	POSITIVE
😾	NEGATIVE
😿	NEGATIVE
🙀	NEGATIVE
🙁	NEGATIVE
🙂	NEUTRAL
🙃	NEUTRAL
🙄	NEGATIVE
🙅	NEGATIVE
🙆	POSITIVE
🙇	NEUTRAL
🙈	NEUTRAL
🙉	NEUTRAL
🙊	NEUTRAL
🙋	POSITIVE
🙌	POSITIVE
🙍	NEGATIVE
🙎	NEGATIVE
🙏	NEUTRAL
🤐	NEGATIVE
🤑	NEUTRAL
🤒	NEGATIVE
🤓	POSITIVE
🤔	NEUTRAL
🤕	NEGATIVE
🤖	NEUTRAL
🤗	POSITIVE
🤞	POSITIVE
🤠	NEUTRAL
🤡	NEUTRAL
🤢	NEGATIVE
🤣	POSITIVE
🤤	POSITIVE
🤥	NEGATIVE
🤦	NEGATIVE
🤧	NEGATIVE
