# Supplementary material for: Depressive Emotion Detection and Behavior Analysis of Men Who Have Sex With Men via Social Media
Source: Front Psychiatry. 2020 Aug 14;11:830. doi: 10.3389/fpsyt.2020.00830 (PMC7456911; doi:10.3389/fpsyt.2020.00830)
Supplement: Additional file 2 — antidepressant_table.xlsx. [file Table_2.xlsx]

## Sheet: Chinese
单胺氧化酶抑制剂
MAO-A
MAOI
SSRI
TCA
阿米替林
阿普唑仑
安非他酮
奥沙氟生
百忧解
半日胺氧化酶抑制剂
苯乙肼
丙咪嗪
单胺氧化酶
丁螺环酮
度洛西汀
多虑平
多塞平
反苯环丙胺
氟伏沙明
氟西汀
可逆性单胺氧化酶一个亚型抑郁剂
兰释
罗拉
氯贝胺
氯丙咪嗪
氯米帕明
马普替林
麦普替林
米安舍林
米氮平
奈法唑酮
萘法唑酮
尼法唑酮
帕罗西汀
哌甲酯
曲唑酮
瑞波西汀
赛乐特
三环类抗抑郁药
舍曲林
圣约翰草干提取物
舒必利
万拉法新
万拉法星
文拉法辛
西酞普兰
喜普妙
选择性5-HT再摄取抑制药
盐酸帕罗西汀
盐酸舍曲林
异丙肼
异卡波肼
左洛复

## Sheet: English
5-HTP
5-Hydroxytryptophan
Abilify
Adapin
Ademetionine
Agedal
Agomelatine
Alnert
Ambivalon
Amineptine
Aminomine
Amioxid
Amisulpride
Amitriptyline
Amitriptylinoxide
Amoxapine
Anafranil
Aripiprazole
Asendin
Atomoxetine
Atypical antipsychotics
Aurorix
Aventyl
Azafen
Azaphen
Befol
Benmoxin
Bifemelane
Brantur
Brexpiprazole
Bupropion
Buspar
Buspirone
Butriptyline
Cantor
carbonate
Caroxazone
Celeport
Celexa
chloride
Cincofarm
Cipralex
Cipramil
Citalopram
citrate
Clédial
Clomipramine
Coaxil
Conflictan
Cymbalta
Deanxit
Demexiptiline
Desipramine
Desvenlafaxine
Desyrel
Dibenzepin
Dimetacrine
Dixeran
Dosulepin
Doxepin
Duloxetine
Dutonin
Edronax
Effexor
Elavil
Eldepryl
Elen
Elronon
Emsam
Endep
Eprobemide
Equilibrin
Escitalopram
Eskalith
Esketamine
Etafron
Etoperidone
Etryptamine
Faverin
Fetzima
Fluoxetine
flupentixol
Fluvoxamine
Gamanil
Gerdaxyl
Heptral
Humoryl
Hypericum
Hypericum perforatum
Imipramine
Imipraminoxide
Indalpine
Indeloxazine
Indopan
Inkazan
Insidon
Iprindole
Iproclozide
Iproniazid
Isocarboxazid
Isoniazid
Istonil
Ixel
Jarsin
Jatrosom N
Ketalar
Ketamine
Kira
Latuda
Levomilnacipran
Levothym
levothyroxine
Lexapro
Linezolid
Lithium
Lithobid
Lofepramine
Lomont
Lucelan
Ludiomil
Lurasidone
Lustral
Luvox
Manerix
Maprotiline
Marplan
Mebanazine
Medifoxamine
Melitracen
Melixeran
Metapramine
Metatone
Metralindole
Metryptamine
Mianserin
Milnacipran
minaprine
Mirtazapine
Moclobemide
Monase
Movina
Nardil
Nefadar
Nefazodone
Nialamide
Nitroxazepine
Nogedal
Noin
Nomifensine
Norpramin
Nortriptyline
Noveril
Noxiptiline
Octamoxin
Olanzapine
Opipramol
Optimax
Oxaflozane
Oxitriptan
Pamelor
Parmodalin
Parnate
Paroxetine
Parstelin
Paxil
perforatum
perphenazine
Pertofrane
Phenelzine
Pheniprazine
Phenoxypropazine
Pipofezine
Pirazidol
Pirlindole
Pivagabine
Pivhydrazine
Pristiq
Propizepine
Prothiaden
Protriptyline
Prozac
Quetiapine
Quinupramine
RbCl
Reboxetine
Remeron
Rexulti
Risperdal
Risperidone
Rubidium
Rubidium chloride
Rubinorm
S-Adenosyl-L-methionine
Safrazine
SAMe
Samyl
Sarafem
Savella
Sediel
Selegiline
Seroquel
Seroxat
Sertraline
Serzone
Setiptiline
Sinequan
Sintamil
SJW
Solian
Spravato
St. John's Wort
Stablon
Stelapar
Strattera
Surmontil
Surodil
Symbyax
T3
T4
Tandospirone
Tecipul
Tedizolid
Teniloxazine
Tetrindole
Thyroid hormones
Thyroxine
Tianeptine
Tiazesim
Timostenil
Tofenacin
Tofranil
Toloxatone
Tolvon
Tonerg
Transmetil
Tranylcypromine
Trausabun
Trazodone
trifluoperazine
Triiodothyronine
Trimipramine
Trintellix
Triptum
Tryptan
Tryptophan
Valdoxan
Venlafaxine
Victoril
Viibryd
Vilazodone
Viloxazine
Vivactil
Vivalan
Vortioxetine
Wellbutrin
Zelapar
Zimelidine
Zoloft
Zyprexa
αET
α-Ethyltryptamine
α-Methyltryptamine
αMT
